# Supplementary material for: Improving model-satellite comparisons of sea ice melt onset with a satellite simulator
Source: Copernicus journal article supplement (doi:10.5194/tc-2021-331), 2021-10-27
Supplement: Supplementary file 1 [file tc-2021-331-supplement.pdf]

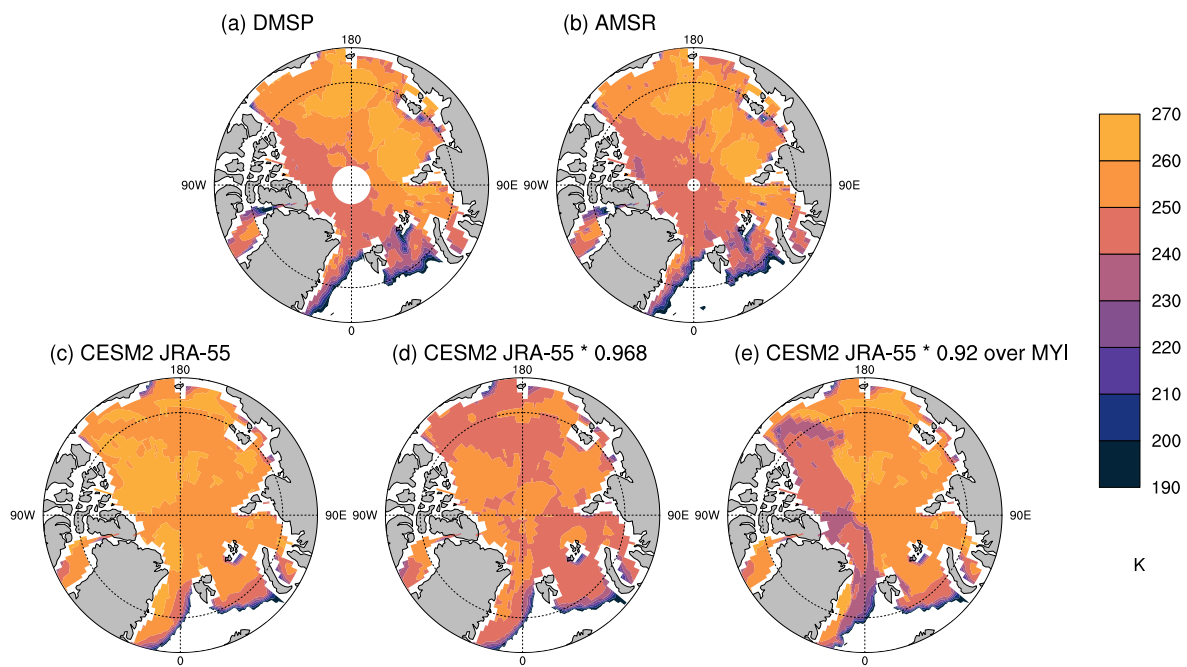

**Figure S1.** Brightness temperatures on June 1, 2003 using (a) DMSP (b) AMSR (c) CEM2 JRA-55 and (d) CEM2 JRA-55 with 0.968 correction as in Burgard et al. (2020a, b) and (e) CEM2 JRA-55 with 0.92 correction applied only to areas of multi-year ice.

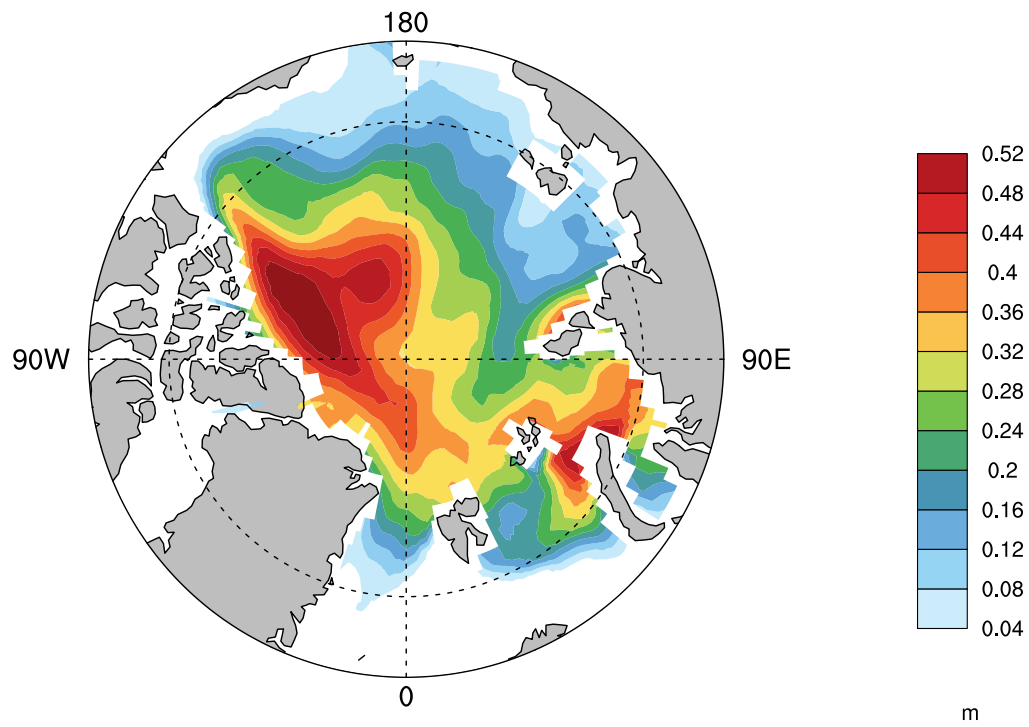

**Figure S2.** CESM JRA-55 snow on sea ice depth on June 1, 2003 (m).
